# Supplementary material
Source: publisher figshare collection journal article supplement (https://frontiersin.figshare.com/ndownloader/files/15050813)
Supplement: Supplementary file 1 [file 15050813]

## *Supplementary Figure 1*

### **Measuring up to reality: null models and analysis simulations to study parental coordination over provisioning offspring**

Malika Ihle\*, Joel L Pick, Isabel S Winney, Shinichi Nakagawa & Terence Burke

\* Correspondence: [malika\\_ihle@hotmail.fr](mailto:malika_ihle@hotmail.fr)

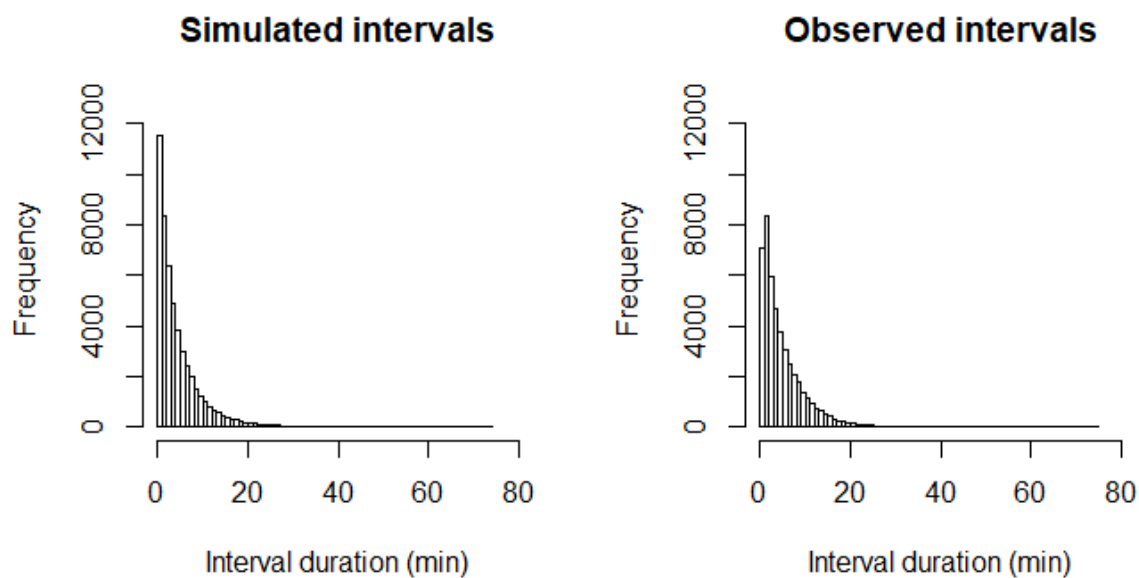

**Supplementary Figure 1.** Distribution of interval durations, for the simulated dataset (n = 51532 intervals) and the observed dataset (n = 47241 intervals).
